# Supplementary material
Source: PubMed Central journal article supplement (PMC2921015)

# $\theta_{\pi}$ (silent)

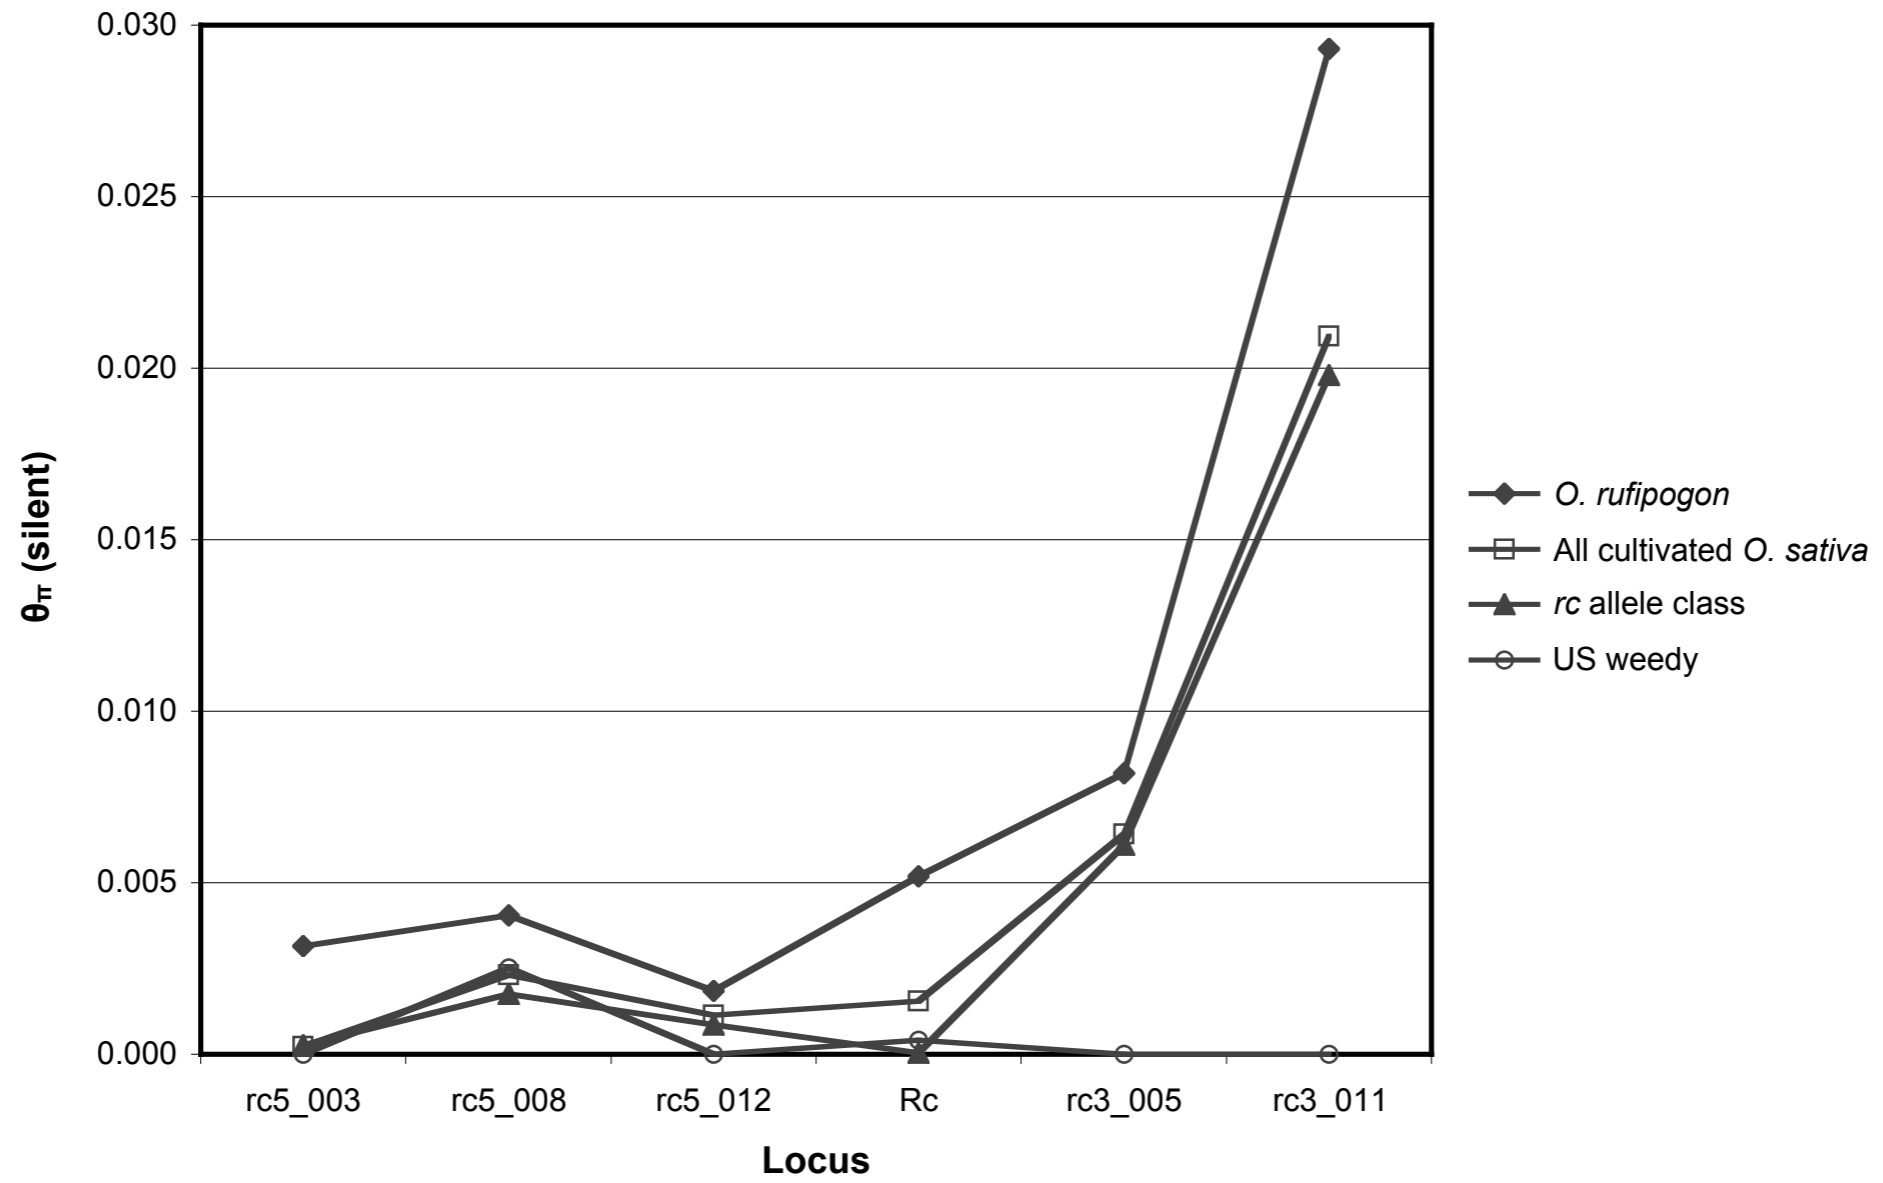

Supplement: NIHMS186225-supplement-SupFig1.pdf [file NIHMS186225-supplement-SupFig1.pdf]
